# Supplementary material for: The Transcriptional Landscape of Immune-Response 3′-UTR Alternative Polyadenylation in Melanoma
Source: Int J Mol Sci. 2024 Mar 6;25(5):3041. doi: 10.3390/ijms25053041 (PMC10931711; doi:10.3390/ijms25053041)
Supplement: Supplementary file 1 [file ijms-25-03041-s001.zip › Supplementary Tables.xlsx]

## Sheet: Table S1
Table S1. The basic statistics for bulk RNA-seq cohorts
Dataset	Cancer Type	Platform	Immunotherapy_Response	No. of cases (%)
GSE78220	Skin Melanoma	GEO	Immunotherapy Responder	13
			Immunotherapy Non-responder	14
GSE91061	Skin Melanoma	GEO	Immunotherapy Responder	82
			Immunotherapy Non-responder	23
PRJEB23709	Skin Melanoma	NCBI-SRA	Immunotherapy Responder	49
			Immunotherapy Non-responder	42
GSE135222	Non-small Cell Lung Cancer	GEO	Immunotherapy Responder	8
			Immunotherapy Non-responder	19
TCGA-SKCM	Skin Melanoma	TCGA	Unknow	102

## Sheet: Table S2
Table S2. The basic statistics of proteomics cohorts
Dataset	Cancer Type	Platform	Immunotherapy_Response	No. of cases (%)
TCGA-SKCM	Skin Melanoma	TCGA	Immunotherapy Responder	19
			Immunotherapy Non-responder	19

## Sheet: Table S3
Table S3. The basic statistics of four scRNA-seq cohorts
Dataset	Cancer Type	Platform	Immunotherapy_Response	No. of cases (%)
GSE232444	Skin Melanoma	GEO	Unknow	4
GSE211504	Skin Melanoma	GEO	Unknow	6
GSE242477	Skin Melanoma	GEO	Unknow	7
GSE229858	Skin Melanoma	GEO	Immunotherapy Responder	6
			Immunotherapy Non-responder	7

## Sheet: Table S4
Table S4. Differential APA events between immunotherapy responders and immunotherapy non-responders in the GSE78220 cohort
APA_events	PRCR_Mean	PD_Mean	Group_Diff_PDUI	P_val	3'-UTR
AGAP10P|chr10|45699170	0.21375	0.332222	0.118472	0.035964	3'UTR_Lengthen
AGAP7P|chr10|46130179	0.6525	0.92	0.2675	0.00599401	3'UTR_Lengthen
AKT3|chr1|243501874	0.681333	0.55	-0.131333	0.04995	3'UTR_Shorten
ASAH2|chr10|50187338	0.557778	0.368571	-0.189206	0.03996	3'UTR_Shorten
ATP8A1|chr4|42412468	0.83875	0.995714	0.156964	0.001998	3'UTR_Lengthen
AUNIP|chr1|25834896	0.631538	0.502727	-0.128811	0.011988	3'UTR_Shorten
B4GALT2|chr1|43990661	0.652333	0.773077	0.120744	0.038961	3'UTR_Lengthen
BCL2L11|chr2|111164296	0.899286	1	0.100714	0.00899101	3'UTR_Lengthen
BORCS8|chr19|19182532	0.160667	0.273077	0.11241	0.021978	3'UTR_Lengthen
BRAP|chr12|111644178	0.621	0.453846	-0.167154	0.00899101	3'UTR_Shorten
C11orf91|chr11|33698363	0.699231	0.50125	-0.197981	0.01998	3'UTR_Shorten
C22orf23|chr22|37943975	0.841429	0.710769	-0.130659	0.02997	3'UTR_Shorten
C2orf74-DT|chr2|61143648	0.303333	0.492308	0.188974	0.013986	3'UTR_Lengthen
C2orf81|chr2|74416090	0.8825	0.985714	0.103214	0.041958	3'UTR_Lengthen
C5orf34|chr5|43486824	0.674545	0.543636	-0.130909	0.044955	3'UTR_Shorten
C5orf34|chr5|43486831	0.772727	0.615455	-0.157273	0.020979	3'UTR_Shorten
C9orf85|chr9|71983918	0.742222	0.555	-0.187222	0.00699301	3'UTR_Shorten
CA14|chr1|150264814	0.683077	0.833	0.149923	0.023976	3'UTR_Lengthen
CACNB1|chr17|39174810	0.76875	0.931111	0.162361	0.04995	3'UTR_Lengthen
CACNB1|chr17|39174811	0.725	0.933333	0.208333	0.040959	3'UTR_Lengthen
CBS|chr21|43053319	0.649231	0.763462	0.114231	0.047952	3'UTR_Lengthen
CCDC191|chr3|113965065	0.714545	0.9025	0.187955	0.044955	3'UTR_Lengthen
CCND2|chr12|4300011	0.99875	0.806364	-0.192386	0.033966	3'UTR_Shorten
CDKL1|chr14|50329640	0.645	0.53	-0.115	0.043956	3'UTR_Shorten
CENPH|chr5|69209898	0.599333	0.771538	0.172205	0.011988	3'UTR_Lengthen
CENPM|chr22|41939045	0.668	0.788462	0.120462	0.027972	3'UTR_Lengthen
CIRBP-AS1|chr19|1268007	0.380909	0.574286	0.193377	0.015984	3'UTR_Lengthen
CITED4|chr1|40862212	0.5	0.76375	0.26375	0.017982	3'UTR_Lengthen
CLDN7|chr17|7260252	0.257	0.399	0.142	0.015984	3'UTR_Lengthen
CLIP3|chr19|36015768	0.711538	0.8725	0.160962	0.021978	3'UTR_Lengthen
CLYBL|chr13|99892594	0.272727	0.08	-0.192727	0.011988	3'UTR_Shorten
CPZ|chr4|8619413	0.556364	0.433636	-0.122727	0.033966	3'UTR_Shorten
CRYBG1|chr6|106568623	0.828182	0.970833	0.142652	0.011988	3'UTR_Lengthen
CSRP2|chr12|76858833	0.69	0.56	-0.13	0.031968	3'UTR_Shorten
CYB5RL|chr1|54190745	0.176667	0.353333	0.176667	0.02997	3'UTR_Lengthen
D2HGDH|chr2|241749016	0.593333	0.78	0.186667	0.013986	3'UTR_Lengthen
D2HGDH|chr2|241755196	0.529167	0.378889	-0.150278	0.00999001	3'UTR_Shorten
DBF4B|chr17|44748949	0.65	0.834545	0.184545	0.00799201	3'UTR_Lengthen
DDX59|chr1|200641034	0.6165	0.787917	0.171417	0.032967	3'UTR_Lengthen
EML2-AS1|chr19|45642376	0.556364	0.764545	0.208182	0.027972	3'UTR_Lengthen
ENDOV|chr17|80429924	0.739286	0.894615	0.15533	0.023976	3'UTR_Lengthen
ENPP1|chr6|131890906	0.556	0.455	-0.101	0.027972	3'UTR_Shorten
ERAP1|chr5|96776273	0.849333	0.716923	-0.13241	0.011988	3'UTR_Shorten
FAM120B|chr6|170404971	0.859333	0.716154	-0.143179	0	3'UTR_Shorten
FAM24B|chr10|122849231	0.403333	0.254	-0.149333	0.017982	3'UTR_Shorten
FBF1|chr17|75910046	0.366	0.516154	0.150154	0.037962	3'UTR_Lengthen
FCGR2A|chr1|161518525	0.613333	0.741923	0.12859	0.036963	3'UTR_Lengthen
FLJ46906|chr6|138697136	0.669286	0.82	0.150714	0.047952	3'UTR_Lengthen
GGCX|chr2|85549931	0.801333	0.681538	-0.119795	0.033966	3'UTR_Shorten
GLB1L|chr2|219237138	0.55	0.7025	0.1525	0.040959	3'UTR_Lengthen
GLT8D2|chr12|103989394	0.951	0.84	-0.111	0.025974	3'UTR_Shorten
GMPR|chr6|16295211	0.639333	0.756154	0.116821	0.037962	3'UTR_Lengthen
GNG7|chr19|2514539	0.515714	0.360833	-0.154881	0.025974	3'UTR_Shorten
GOLGA4-AS1|chr3|37243297	0.773333	0.5525	-0.220833	0.043956	3'UTR_Shorten
GTPBP3|chr19|17341955	0.611333	0.727692	0.116359	0.047952	3'UTR_Lengthen
HOXB13|chr17|48726504	0.634545	0.458182	-0.176364	0.033966	3'UTR_Shorten
HOXC5|chr12|54034429	0.60625	0.85	0.24375	0.00599401	3'UTR_Lengthen
HPGDS|chr4|94299493	0.497778	0.741429	0.243651	0.037962	3'UTR_Lengthen
HPS4|chr22|26451670	0.657143	0.852308	0.195165	0.001998	3'UTR_Lengthen
INO80E|chr16|30003776	0.676667	0.829231	0.152564	0.001998	3'UTR_Lengthen
JADE2|chr5|134579234	0.885238	0.735641	-0.149597	0.00932401	3'UTR_Shorten
JUP|chr17|41755744	0.734	0.85	0.116	0.02997	3'UTR_Lengthen
KIF3C|chr2|25927876	0.735714	0.537692	-0.198022	0.011988	3'UTR_Shorten
KRBA1|chr7|149721535	0.118	0.222308	0.104308	0.017982	3'UTR_Lengthen
LETM1|chr4|1814363	0.508	0.393077	-0.114923	0.00799201	3'UTR_Shorten
LINC00665|chr19|36320100	0.17625	0.477143	0.300893	0.003996	3'UTR_Lengthen
LINC01002|chr19|201368	0.428667	0.631538	0.202872	0.015984	3'UTR_Lengthen
LINC02732|chr11|110406418	0.78	0.8975	0.1175	0.013986	3'UTR_Lengthen
LNP1|chr3|100455955	0.464615	0.59	0.125385	0.041958	3'UTR_Lengthen
LOC101928304|chr6|134525392	0.525	0.355556	-0.169444	0.02997	3'UTR_Shorten
LOC105372141|chr18|57738373	0.47125	0.725714	0.254464	0.047952	3'UTR_Lengthen
LOC729218|chr4|118630993	0.710909	0.907	0.196091	0.045954	3'UTR_Lengthen
LRRC23|chr12|6914042	0.377333	0.560769	0.183436	0.001998	3'UTR_Lengthen
LSM11|chr5|157755230	0.815455	0.636364	-0.179091	0.04995	3'UTR_Shorten
LZIC|chr1|9922207	0.4505	0.287917	-0.162583	0.00899101	3'UTR_Shorten
MAGEA3|chrX|152700919	0.593077	0.826923	0.233846	0.033966	3'UTR_Lengthen
MAOA|chrX|43744703	0.445	0.62	0.175	0.031968	3'UTR_Lengthen
MCAT|chr22|43133048	0.652667	0.770769	0.118103	0.03996	3'UTR_Lengthen
MED11|chr17|4733368	0.812667	0.939231	0.126564	0.013986	3'UTR_Lengthen
MEF2D|chr1|156466314	0.669333	0.549231	-0.120103	0.047952	3'UTR_Shorten
METTL17|chr14|20996711	0.644333	0.746538	0.102205	0.013986	3'UTR_Lengthen
MLH3|chr14|75015711	0.8725	0.727143	-0.145357	0.027972	3'UTR_Shorten
MYO1G|chr7|44962744	0.405556	0.255833	-0.149722	0.017982	3'UTR_Shorten
N4BP1|chr16|48542599	0.374667	0.273077	-0.10159	0.043956	3'UTR_Shorten
NBPF3|chr1|21483301	0.866	0.988889	0.122889	0.043956	3'UTR_Lengthen
NOSTRIN|chr2|168864985	0.595556	0.398462	-0.197094	0.024975	3'UTR_Shorten
NRIP3|chr11|8981964	0.75625	0.889091	0.132841	0.021978	3'UTR_Lengthen
NUDT8|chr11|67628090	0.571333	0.71	0.138667	0.023976	3'UTR_Lengthen
NUDT8|chr11|67628100	0.462667	0.603846	0.141179	0.013986	3'UTR_Lengthen
OR2A9P|chr7|144299816	0.8525	0.730909	-0.121591	0.031968	3'UTR_Shorten
OTULIN|chr5|14713667	0.5	0.19625	-0.30375	0.00999001	3'UTR_Shorten
PAXBP1|chr21|32741471	0.645556	0.429	-0.216556	0.025974	3'UTR_Shorten
PGS1|chr17|78420989	0.8075	0.952727	0.145227	0.00999001	3'UTR_Lengthen
PIK3R6|chr17|8803273	0.725111	0.92275	0.197639	0.0215784	3'UTR_Lengthen
PNKD|chr2|218272721	0.626667	0.759231	0.132564	0.027972	3'UTR_Lengthen
POMT2|chr14|77277157	0.517333	0.383846	-0.133487	0.041958	3'UTR_Shorten
PPAN-P2RY11|chr19|10113821	0.812667	0.927692	0.115026	0.023976	3'UTR_Lengthen
PRRG4|chr11|32853516	0.7775	0.55875	-0.21875	0.00799201	3'UTR_Shorten
PRXL2B|chr1|2589654	0.762	0.865385	0.103385	0.011988	3'UTR_Lengthen
PWWP2B|chr10|132417320	0.77	0.920769	0.150769	0.024975	3'UTR_Lengthen
RAB7B|chr1|205978382	0.921667	0.79625	-0.125417	0.045954	3'UTR_Shorten
RAMP1|chr2|237911709	0.58	0.7425	0.1625	0.023976	3'UTR_Lengthen
RAMP1|chr2|237911731	0.57	0.738333	0.168333	0.037962	3'UTR_Lengthen
RASIP1|chr19|48720717	0.865333	0.71	-0.155333	0.031968	3'UTR_Shorten
REEP2|chr5|138445888	0.43375	0.664444	0.230694	0.00799201	3'UTR_Lengthen
RXRA|chr9|134436731	0.65	0.546154	-0.103846	0.041958	3'UTR_Shorten
SDSL|chr12|113438037	0.708	0.825385	0.117385	0.015984	3'UTR_Lengthen
SETMAR|chr3|4313761	0.2275	0.104286	-0.123214	0.03996	3'UTR_Shorten
SH3GLB2|chr9|129008631	0.737	0.86	0.123	0.024975	3'UTR_Lengthen
SHLD1|chr20|5773286	0.676	0.84	0.164	0.03996	3'UTR_Lengthen
SLC10A3|chrX|154488345	0.752	0.878462	0.126462	0.021978	3'UTR_Lengthen
SLC2A8|chr9|127407534	0.702667	0.832308	0.129641	0.047952	3'UTR_Lengthen
SLC45A4|chr8|141212178	0.288667	0.181538	-0.107128	0.00599401	3'UTR_Shorten
SPDYE11|chr7|73050347	0.898	0.765833	-0.132167	0.04995	3'UTR_Shorten
SRP14-DT|chr15|40056881	0.494444	0.21	-0.284444	0.00999001	3'UTR_Shorten
STX16-NPEPL1|chr20|58715471	0.577857	0.71	0.132143	0.041958	3'UTR_Lengthen
SYK|chr9|90896356	0.88	0.717692	-0.162308	0.023976	3'UTR_Shorten
TANC2|chr17|63420147	0.86125	0.9875	0.12625	0.045954	3'UTR_Lengthen
TANC2|chr17|63420150	0.86375	0.9875	0.12375	0.0434565	3'UTR_Lengthen
TDRP|chr8|492383	0.895	0.67875	-0.21625	0.035964	3'UTR_Shorten
TICRR|chr15|89627107	0.705	0.899167	0.194167	0.011988	3'UTR_Lengthen
TM4SF18|chr3|149321107	0.388462	0.533636	0.145175	0.023976	3'UTR_Lengthen
TMIGD3|chr1|111483486	0.689	0.891818	0.202818	0.027972	3'UTR_Lengthen
TP53RK|chr20|46686679	0.405333	0.296154	-0.109179	0.013986	3'UTR_Shorten
TPT1-AS1|chr13|45391183	0.628667	0.794615	0.165949	0.025974	3'UTR_Lengthen
TREM1|chr6|41276049	0.33875	0.199167	-0.139583	0.04995	3'UTR_Shorten
TROAP|chr12|49330296	0.807143	0.933077	0.125934	0.027972	3'UTR_Lengthen
TUBGCP4|chr15|43408088	0.461429	0.32	-0.141429	0.00999001	3'UTR_Shorten
ZDHHC21|chr9|14615619	0.304167	0.432857	0.12869	0.041958	3'UTR_Lengthen
ZMYM3|chrX|71249460	0.178667	0.292308	0.113641	0.027972	3'UTR_Lengthen
ZNF667-AS1|chr19|56494342	0.42	0.672727	0.252727	0.02997	3'UTR_Lengthen

## Sheet: Table S5
Table S5. Differential APA events between immunotherapy responders and immunotherapy non-responders in the GSE91061 cohort
APA_events	PRCR_Mean	PD_Mean	Group_Diff_PDUI	P_val	3'-UTR
ABRAXAS1|chr4|83462526	0.7045	0.601316	-0.103184	0.022977	3'UTR_Shorten
ACSF3|chr16|89154368	0.600217	0.483563	-0.116655	0.00699301	3'UTR_Shorten
AIM2|chr1|159062566	0.53	0.371176	-0.158824	0	3'UTR_Shorten
AIM2|chr1|159062567	0.550667	0.389216	-0.161451	0.001998	3'UTR_Shorten
ALG9|chr11|111786369	0.69587	0.550802	-0.145067	0.00699301	3'UTR_Shorten
ANKRD10|chr13|110900529	0.792907	0.674444	-0.118463	0.00599401	3'UTR_Shorten
ANKRD22|chr10|88822736	0.550667	0.675102	0.124435	0.00999001	3'UTR_Lengthen
ASS1|chr9|130501127	0.533	0.416	-0.117	0.027972	3'UTR_Shorten
BCL2L11|chr2|111164284	0.959545	0.847049	-0.112496	0.025974	3'UTR_Shorten
C20orf96|chr20|271115	0.322222	0.424783	0.10256	0.035964	3'UTR_Lengthen
CALHM2|chr10|103447417	0.790435	0.895065	0.10463	0.000666001	3'UTR_Lengthen
CAPN5|chr11|77124455	0.774667	0.661918	-0.112749	0.003996	3'UTR_Shorten
CD109|chr6|73823672	0.75	0.628788	-0.121212	0.00999001	3'UTR_Shorten
CD79B|chr17|63928940	0.819444	0.716724	-0.10272	0.047952	3'UTR_Shorten
CDH13|chr16|83796386	0.419231	0.298636	-0.120594	0.037962	3'UTR_Shorten
CELF2|chr10|11334307	0.377045	0.272405	-0.10464	0	3'UTR_Shorten
CENPM|chr22|41939045	0.822353	0.709538	-0.112814	0.033966	3'UTR_Shorten
CERS1|chr19|18878888	0.389286	0.505479	0.116194	0.025974	3'UTR_Lengthen
CHMP6|chr17|80999824	0.818	0.7036	-0.1144	0.00999001	3'UTR_Shorten
CHURC1|chr14|64932289	0.77913	0.612073	-0.167057	0.003996	3'UTR_Shorten
CIZ1|chr9|128166255	0.724783	0.859753	0.13497	0.003996	3'UTR_Lengthen
CLOCK|chr4|55435306	0.74	0.849254	0.109254	0.00999001	3'UTR_Lengthen
CLPX|chr15|65150608	0.435217	0.544198	0.10898	0.00999001	3'UTR_Lengthen
CNTRL|chr9|121177406	0.493913	0.601667	0.107754	0.00799201	3'UTR_Lengthen
CPT1C|chr19|49713615	0.668333	0.83814	0.169806	0.02997	3'UTR_Lengthen
CRTC1|chr19|18777355	0.344706	0.215972	-0.128734	0.00799201	3'UTR_Shorten
CTC1|chr17|8227949	0.403261	0.295127	-0.108134	0	3'UTR_Shorten
CTPS2|chrX|16589583	0.775797	0.661496	-0.114301	0.00999001	3'UTR_Shorten
CTTN|chr11|70422660	0.6075	0.767903	0.160403	0.003996	3'UTR_Lengthen
CYP2R1|chr11|14878112	0.589783	0.467687	-0.122095	0.012987	3'UTR_Shorten
DHX8|chr17|43525855	0.93	0.829773	-0.100227	0.01998	3'UTR_Shorten
DNAJB5|chr9|34997415	0.698095	0.804561	0.106466	0.017982	3'UTR_Lengthen
DYNC2H1|chr11|103479319	0.579375	0.693676	0.114301	0.02997	3'UTR_Lengthen
FAM104B|chrX|55143724	0.723529	0.86629	0.142761	0.025974	3'UTR_Lengthen
FAM228B|chr2|24169507	0.5705	0.686709	0.116209	0.021978	3'UTR_Lengthen
FBXL20|chr17|39260666	0.633571	0.487778	-0.145794	0.001998	3'UTR_Shorten
FKTN|chr9|105635209	0.831667	0.934839	0.103172	0.003996	3'UTR_Lengthen
FMO2|chr1|171211115	0.306667	0.194318	-0.112348	0	3'UTR_Shorten
FUT10|chr8|33372114	0.693846	0.590455	-0.103392	0.021978	3'UTR_Shorten
GBGT1|chr9|133153443	0.84	0.737018	-0.102982	0.043956	3'UTR_Shorten
GBGT1|chr9|133153444	0.837222	0.735862	-0.10136	0.031968	3'UTR_Shorten
GGT1|chr22|24628875	0.629333	0.762093	0.13276	0.011988	3'UTR_Lengthen
GINS1|chr20|25446086	0.5	0.691746	0.191746	0.01998	3'UTR_Lengthen
GS1-124K5.4|chr7|66495406	0.652857	0.791379	0.138522	0.04995	3'UTR_Lengthen
HAUS8|chr19|17049930	0.802381	0.679859	-0.122522	0.00799201	3'UTR_Shorten
HAUS8|chr19|17049932	0.860476	0.758592	-0.101885	0.025974	3'UTR_Shorten
HLA-J|chr6|30009686	0.402	0.269091	-0.132909	0.03996	3'UTR_Shorten
INTS9|chr8|28767845	0.726677	0.620603	-0.106075	0.01998	3'UTR_Shorten
IRF5|chr7|128949338	0.551905	0.405	-0.146905	0.035964	3'UTR_Shorten
ITPA|chr20|3219153	0.5025	0.359833	-0.142667	0.045954	3'UTR_Shorten
KPTN|chr19|47475393	0.857917	0.964457	0.10654	0.02997	3'UTR_Lengthen
LCORL|chr4|17845728	0.566852	0.463816	-0.103035	0.010656	3'UTR_Shorten
LINC-PINT|chr7|130945684	0.5415	0.678143	0.136643	0.015984	3'UTR_Lengthen
LINC01061|chr4|119409970	0.460667	0.360625	-0.100042	0.031968	3'UTR_Shorten
LINC02802|chr1|144227117	0.431053	0.6272	0.196147	0.001998	3'UTR_Lengthen
LOC107985200|chr1|143401518	0.466875	0.687324	0.220449	0.001998	3'UTR_Lengthen
LOC107987072|chr9|66284999	0.80087	0.7	-0.10087	0.01998	3'UTR_Shorten
LOC112267872|chr19|19789101	0.7625	0.564615	-0.197885	0.01998	3'UTR_Shorten
LOC653513|chr1|149197997	0.297273	0.479605	0.182333	0.001998	3'UTR_Lengthen
LRCH4|chr7|100574792	0.507222	0.323611	-0.183611	0	3'UTR_Shorten
LSP1P4|chr2|91636771	0.372632	0.524615	0.151984	0.001998	3'UTR_Lengthen
LSP1P5|chr1|144739258	0.411053	0.595195	0.184142	0.00999001	3'UTR_Lengthen
MAL|chr2|95053532	0.924615	0.802174	-0.122441	0.031968	3'UTR_Shorten
MAN1C1|chr1|25784302	0.632609	0.740725	0.108116	0.011988	3'UTR_Lengthen
MRM1|chr17|36608409	0.628947	0.762838	0.13389	0.00599401	3'UTR_Lengthen
NAF1|chr4|163126906	0.745	0.885556	0.140556	0.041958	3'UTR_Lengthen
NDE1|chr16|15724409	0.609565	0.823038	0.213473	0	3'UTR_Lengthen
NDUFA6-DT|chr22|42125027	0.758571	0.645844	-0.112727	0.035964	3'UTR_Shorten
NEXN|chr1|77942699	0.728824	0.603191	-0.125632	0.003996	3'UTR_Shorten
NFXL1|chr4|47847518	0.48775	0.616618	0.128868	0.033966	3'UTR_Lengthen
NPAS2|chr2|100996510	0.745294	0.63169	-0.113604	0.031968	3'UTR_Shorten
NR4A2|chr2|156325309	0.883333	0.744098	-0.139235	0.02997	3'UTR_Shorten
NSDHL|chrX|152869118	0.676522	0.787407	0.110886	0.00599401	3'UTR_Lengthen
PASK|chr2|241115026	0.249333	0.383333	0.134	0	3'UTR_Lengthen
PDCD6P1|chr5|1599626	0.330714	0.437544	0.10683	0.025974	3'UTR_Lengthen
PDE4DIP|chr1|148932288	0.196818	0.323418	0.1266	0.001998	3'UTR_Lengthen
PLPP5|chr8|38264795	0.376	0.534561	0.158561	0.03996	3'UTR_Lengthen
POPDC3|chr6|105158489	0.665	0.801786	0.136786	0.027972	3'UTR_Lengthen
PPP1R13B|chr14|103734435	0.578852	0.458056	-0.120796	0.02997	3'UTR_Shorten
PPP3CB-AS1|chr10|73505426	0.416471	0.213585	-0.202886	0.001998	3'UTR_Shorten
PPP3CB-AS1|chr10|73505429	0.261429	0.142027	-0.119402	0.00999001	3'UTR_Shorten
PPP3CB|chr10|73444671	0.320435	0.478171	0.157736	0	3'UTR_Lengthen
PSTPIP1|chr15|77037196	0.65625	0.540364	-0.115886	0.04995	3'UTR_Shorten
PSTPIP2|chr18|45984200	0.644737	0.488088	-0.156649	0	3'UTR_Shorten
PUS7L|chr12|43728720	0.544167	0.443898	-0.100268	0.035964	3'UTR_Shorten
PWWP2B|chr10|132417212	0.821389	0.9216	0.100211	0.045954	3'UTR_Lengthen
RABEP1|chr17|5383629	0.876377	0.75	-0.126377	0	3'UTR_Shorten
REL|chr2|60922348	0.950833	0.83566	-0.115173	0.011988	3'UTR_Shorten
ROPN1B|chr3|125983405	0.421333	0.52913	0.107797	0.00599401	3'UTR_Lengthen
RPSAP9|chr9|76398797	0.443043	0.644231	0.201187	0	3'UTR_Lengthen
RWDD4|chr4|183640937	0.706522	0.818395	0.111873	0	3'UTR_Lengthen
SLC38A10|chr17|81251461	0.623333	0.793607	0.170273	0.023976	3'UTR_Lengthen
SPDYE3|chr7|100319813	0.663182	0.766986	0.103804	0.011988	3'UTR_Lengthen
SPTBN1|chr2|54660087	0.246087	0.38878	0.142694	0	3'UTR_Lengthen
SUV39H2|chr10|14903038	0.494	0.388165	-0.105835	0.013986	3'UTR_Shorten
TANGO6|chr16|69084186	0.552273	0.431194	-0.121079	0	3'UTR_Shorten
TESC|chr12|117039059	0.417059	0.3	-0.117059	0.00999001	3'UTR_Shorten
TIRAP|chr11|126292628	0.7	0.570606	-0.129394	0.01998	3'UTR_Shorten
TM2D3|chr15|101633323	0.455833	0.329111	-0.126722	0.011988	3'UTR_Shorten
TMEM116|chr12|111931488	0.582222	0.448553	-0.13367	0.016983	3'UTR_Shorten
TMEM147-AS1|chr19|35541433	0.562143	0.69283	0.130687	0.045954	3'UTR_Lengthen
TMEM241|chr18|23297893	0.769231	0.870545	0.101315	0.045954	3'UTR_Lengthen
TRAIP|chr3|49828905	0.798571	0.638333	-0.160238	0.00699301	3'UTR_Shorten
TRIM5|chr11|5665531	0.382143	0.544694	0.162551	0.02997	3'UTR_Lengthen
TUBD1|chr17|59860273	0.794375	0.666967	-0.127408	0.017982	3'UTR_Shorten
TYW3|chr1|74766443	0.518696	0.366049	-0.152646	0	3'UTR_Shorten
UBALD1|chr16|4609149	0.504211	0.39225	-0.111961	0.037962	3'UTR_Shorten
WWP2|chr16|69908912	0.414545	0.548108	0.133563	0.015984	3'UTR_Lengthen
ZDHHC12-DT|chr9|128733032	0.635	0.783846	0.148846	0.015984	3'UTR_Lengthen
ZNF34|chr8|144774454	0.828333	0.949245	0.120912	0.025974	3'UTR_Lengthen
ZNF799|chr19|12392055	0.750667	0.862037	0.11137	0.023976	3'UTR_Lengthen
ZSWIM7|chr17|15977757	0.355217	0.237927	-0.117291	0.001998	3'UTR_Shorten

## Sheet: Table S6
Table S6. Results of enrichment analysis of GSE78220_3'-UTR_Shortening
Term	Description	LogP	Log(q-value)	Symbols
GO:0001525	angiogenesis	-3.59551	0	SYK,HOXB13,ERAP1,RASIP1,OTULIN,N4BP1,RAB7B,ENPP1,MYO1G,NOSTRIN,TREM1
GO:0001525	angiogenesis	-3.59551	0	SYK,HOXB13,ERAP1,RASIP1,OTULIN
GO:0045088	regulation of innate immune response	-3.31493	0	SYK,N4BP1,ERAP1,OTULIN,RAB7B
GO:0048514	blood vessel morphogenesis	-3.10859	0	SYK,HOXB13,ERAP1,RASIP1,OTULIN
GO:0002831	regulation of response to biotic stimulus	-2.90811	0	SYK,N4BP1,ERAP1,OTULIN,RAB7B
GO:0001568	blood vessel development	-2.75445	0	SYK,HOXB13,ERAP1,RASIP1,OTULIN
GO:0006897	endocytosis	-2.711	0	ENPP1,SYK,MYO1G,NOSTRIN,RAB7B
GO:0001944	vasculature development	-2.68618	0	SYK,HOXB13,ERAP1,RASIP1,OTULIN
GO:0006909	phagocytosis	-2.61545	0	SYK,MYO1G,RAB7B
GO:0035239	tube morphogenesis	-2.24914	0	SYK,HOXB13,ERAP1,RASIP1,OTULIN
GO:0002443	leukocyte mediated immunity	-2.17089	0	SYK,TREM1,MYO1G
GO:0051090	regulation of DNA-binding transcription factor activity	-2.11125	0	ENPP1,SYK,OTULIN,RAB7B
GO:0050900	leukocyte migration	-2.09518	0	SYK,TREM1,MYO1G
GO:0045087	innate immune response	-2.03181	0	SYK,N4BP1,TREM1,OTULIN,RAB7B
GO:0031347	regulation of defense response	-1.97561	0	SYK,N4BP1,ERAP1,OTULIN,RAB7B
GO:0002757	immune response-activating signaling pathway	-1.84481	0	SYK,MYO1G,OTULIN
GO:0031348	negative regulation of defense response	-1.81831	0	SYK,OTULIN,RAB7B
GO:0002764	immune response-regulating signaling pathway	-1.73243	0	SYK,MYO1G,OTULIN
GO:0002250	adaptive immune response	-1.64021	0	SYK,ERAP1,TREM1,MYO1G
GO:0002253	activation of immune response	-1.62227	0	SYK,MYO1G,OTULIN
GO:0002252	immune effector process	-1.53453	0	SYK,TREM1,MYO1G
GO:0032102	negative regulation of response to external stimulus	-1.35955	0	SYK,OTULIN,RAB7B
hsa04151	PI3K-Akt signaling pathway	-3.49141	0	CCND2,GNG7,RXRA,SYK,AKT3,MEF2D,CDKL1,TP53RK,BRAP
hsa04151	PI3K-Akt signaling pathway	-3.49141	0	CCND2,GNG7,RXRA,SYK,AKT3
hsa04371	Apelin signaling pathway	-2.77377	0	GNG7,MEF2D,AKT3
hsa05167	Kaposi sarcoma-associated herpesvirus infection	-2.36492	0	GNG7,SYK,AKT3
hsa05169	Epstein-Barr virus infection	-2.3161	0	CCND2,SYK,AKT3
GO:0004674	protein serine/threonine kinase activity	-2.23282	0	SYK,CDKL1,AKT3,TP53RK
hsa04014	Ras signaling pathway	-2.12985	0	GNG7,BRAP,AKT3
hsa05200	Pathways in cancer	-1.91191	0	CCND2,GNG7,RXRA,AKT3
GO:0004672	protein kinase activity	-1.82955	0	SYK,CDKL1,AKT3,TP53RK
GO:0106310	protein serine kinase activity	-1.6346	0	CDKL1,AKT3,TP53RK
GO:0016773	phosphotransferase activity, alcohol group as acceptor	-1.58485	0	SYK,CDKL1,AKT3,TP53RK
GO:0006468	protein phosphorylation	-1.53609	0	SYK,CDKL1,AKT3,TP53RK
GO:0016301	kinase activity	-1.47429	0	SYK,CDKL1,AKT3,TP53RK
GO:0030522	intracellular receptor signaling pathway	-2.56967	0	RXRA,FAM120B,OTULIN
GO:0030522	intracellular receptor signaling pathway	-2.56967	0	RXRA,FAM120B,OTULIN
GO:0071900	regulation of protein serine/threonine kinase activity	-2.48107	0	CCND2,SYK,RASIP1,SPDYE11,LSM11
GO:0071900	regulation of protein serine/threonine kinase activity	-2.48107	0	CCND2,SYK,RASIP1,SPDYE11
GO:0071902	positive regulation of protein serine/threonine kinase activity	-2.36492	0	CCND2,SYK,SPDYE11
GO:0045859	regulation of protein kinase activity	-1.68245	0	CCND2,SYK,RASIP1,SPDYE11
GO:0045787	positive regulation of cell cycle	-1.66293	0	CCND2,LSM11,SPDYE11
GO:0045860	positive regulation of protein kinase activity	-1.62841	0	CCND2,SYK,SPDYE11
GO:0043549	regulation of kinase activity	-1.48751	0	CCND2,SYK,RASIP1,SPDYE11
GO:0033674	positive regulation of kinase activity	-1.44665	0	CCND2,SYK,SPDYE11
GO:0090305	nucleic acid phosphodiester bond hydrolysis	-2.44912	0	ENPP1,SETMAR,N4BP1,MEF2D,RASIP1
GO:0090305	nucleic acid phosphodiester bond hydrolysis	-2.44912	0	ENPP1,SETMAR,N4BP1
GO:0004518	nuclease activity	-2.26934	0	ENPP1,SETMAR,N4BP1
GO:0042803	protein homodimerization activity	-1.51056	0	MEF2D,ENPP1,SETMAR,RASIP1
GO:0031400	negative regulation of protein modification process	-1.31901	0	ENPP1,N4BP1,RASIP1
GO:0018193	peptidyl-amino acid modification	-2.12905	0	GGCX,SETMAR,SYK,AKT3,JADE2,HOXB13
GO:0018193	peptidyl-amino acid modification	-2.12905	0	GGCX,SETMAR,SYK,AKT3,JADE2
GO:0009611	response to wounding	-1.39004	0	GGCX,SYK,HOXB13
GO:0016462	pyrophosphatase activity	-2.02266	0	ARF3,KIF3C,ENPP1,MLH3,RAB7B
GO:0016462	pyrophosphatase activity	-2.02266	0	ARF3,KIF3C,ENPP1,MLH3,RAB7B
GO:0016817	hydrolase activity, acting on acid anhydrides	-2.02039	0	ARF3,KIF3C,ENPP1,MLH3,RAB7B
GO:0016818	hydrolase activity, acting on acid anhydrides, in phosphorus-containing anhydrides	-2.02039	0	ARF3,KIF3C,ENPP1,MLH3,RAB7B
GO:0017111	ribonucleoside triphosphate phosphatase activity	-1.50089	0	ARF3,KIF3C,MLH3,RAB7B
GO:0007346	regulation of mitotic cell cycle	-1.94818	0	CCND2,SETMAR,ASAH2,LSM11
GO:0007346	regulation of mitotic cell cycle	-1.94818	0	CCND2,SETMAR,ASAH2,LSM11
GO:1901987	regulation of cell cycle phase transition	-1.38054	0	CCND2,SETMAR,LSM11
GO:0097435	supramolecular fiber organization	-1.8117	0	CSRP2,TUBGCP4,MYO1G,NOSTRIN
GO:0097435	supramolecular fiber organization	-1.8117	0	CSRP2,TUBGCP4,MYO1G,NOSTRIN
GO:0042277	peptide binding	-1.78524	0	RXRA,BRAP,ERAP1
GO:0042277	peptide binding	-1.78524	0	RXRA,BRAP,ERAP1
GO:0033218	amide binding	-1.52067	0	RXRA,BRAP,ERAP1
GO:0005509	calcium ion binding	-1.51056	0	LETM1,ENPP1,ASAH2,PRRG4
GO:0005509	calcium ion binding	-1.51056	0	LETM1,ENPP1,ASAH2,PRRG4

## Sheet: Table S7
Table S7. Results of enrichment analysis of GSE78220_3'-UTR_Lengthening
Term	Description	LogP	Log(q-value)	Symbols
hsa00260	Glycine, serine and threonine metabolism	-3.90308	0	CBS,MAOA,SDSL,PNKD,MCAT,NUDT8,CA14
hsa00260	Glycine, serine and threonine metabolism	-3.90308	0	CBS,MAOA,SDSL
GO:0044282	small molecule catabolic process	-2.78194	0	CBS,PNKD,MCAT,SDSL,NUDT8
GO:0016054	organic acid catabolic process	-2.60142	0	CBS,MCAT,SDSL,NUDT8
GO:0046395	carboxylic acid catabolic process	-2.60142	0	CBS,MCAT,SDSL,NUDT8
GO:0016829	lyase activity	-1.92236	0	CBS,CA14,SDSL
GO:0046394	carboxylic acid biosynthetic process	-3.27187	0	CBS,HPGDS,MCAT,SDSL,PRXL2B,NUDT8,PNKD,PGS1,PIK3R6
GO:0046394	carboxylic acid biosynthetic process	-3.27187	0	CBS,HPGDS,MCAT,SDSL,PRXL2B
GO:0016053	organic acid biosynthetic process	-3.25048	0	CBS,HPGDS,MCAT,SDSL,PRXL2B
GO:0006633	fatty acid biosynthetic process	-2.55088	0	HPGDS,MCAT,PRXL2B
GO:0044283	small molecule biosynthetic process	-2.30606	0	CBS,HPGDS,MCAT,SDSL,PRXL2B
GO:0072330	monocarboxylic acid biosynthetic process	-2.11775	0	HPGDS,MCAT,PRXL2B
GO:0006631	fatty acid metabolic process	-2.11723	0	HPGDS,MCAT,PRXL2B,NUDT8
GO:0032787	monocarboxylic acid metabolic process	-2.0984	0	PNKD,HPGDS,MCAT,PRXL2B,NUDT8
GO:0008610	lipid biosynthetic process	-1.82879	0	PGS1,HPGDS,MCAT,PRXL2B,PIK3R6
GO:0000287	magnesium ion binding	-2.65597	0	ATP8A1,HPGDS,NUDT8,ENDOV,DDX59,GTPBP3,AGAP7P
GO:0000287	magnesium ion binding	-2.65597	0	ATP8A1,HPGDS,NUDT8,ENDOV
GO:0016462	pyrophosphatase activity	-1.41293	0	ATP8A1,DDX59,GTPBP3,NUDT8,AGAP7P
GO:0016817	hydrolase activity, acting on acid anhydrides	-1.4109	0	ATP8A1,DDX59,GTPBP3,NUDT8,AGAP7P
GO:0016818	hydrolase activity, acting on acid anhydrides, in phosphorus-containing anhydrides	-1.4109	0	ATP8A1,DDX59,GTPBP3,NUDT8,AGAP7P
GO:0007043	cell-cell junction assembly	-2.42104	0	CLDN7,JUP,FBF1,CACNB1
GO:0007043	cell-cell junction assembly	-2.42104	0	CLDN7,JUP,FBF1
GO:0045216	cell-cell junction organization	-2.02204	0	CLDN7,JUP,FBF1
GO:0034329	cell junction assembly	-1.52154	0	CLDN7,JUP,FBF1
GO:0034330	cell junction organization	-1.42509	0	CACNB1,CLDN7,JUP,FBF1
GO:0006275	regulation of DNA replication	-2.41165	0	DBF4B,TICRR,INO80E,SHLD1,ENDOV,BCL2L11,CBS
GO:0006275	regulation of DNA replication	-2.41165	0	DBF4B,TICRR,INO80E
GO:0006281	DNA repair	-1.47507	0	TICRR,SHLD1,INO80E,ENDOV
GO:0006974	DNA damage response	-1.45011	0	BCL2L11,TICRR,SHLD1,INO80E,ENDOV
GO:0051054	positive regulation of DNA metabolic process	-1.43484	0	DBF4B,SHLD1,INO80E
GO:0051052	regulation of DNA metabolic process	-1.39722	0	DBF4B,TICRR,SHLD1,INO80E
GO:0006259	DNA metabolic process	-1.39479	0	CBS,TICRR,SHLD1,INO80E,ENDOV
GO:0006937	regulation of muscle contraction	-2.07567	0	CACNB1,JUP,ZDHHC21,TMIGD3,RAMP1,REEP2,CLIP3,HPS4
GO:0006937	regulation of muscle contraction	-2.07567	0	CACNB1,JUP,ZDHHC21
GO:0090257	regulation of muscle system process	-1.63035	0	CACNB1,JUP,ZDHHC21
GO:1903522	regulation of blood circulation	-1.61278	0	JUP,TMIGD3,ZDHHC21
GO:0072657	protein localization to membrane	-1.57671	0	JUP,RAMP1,REEP2,ZDHHC21
GO:0006886	intracellular protein transport	-1.56235	0	RAMP1,CLIP3,REEP2,HPS4,ZDHHC21
GO:0051668	localization within membrane	-1.34603	0	JUP,RAMP1,REEP2,ZDHHC21
GO:0032386	regulation of intracellular transport	-1.32979	0	JUP,REEP2,HPS4
GO:0016491	oxidoreductase activity	-2.06219	0	CBS,GMPR,MAOA,PRXL2B,CYB5RL,D2HGDH
GO:0016491	oxidoreductase activity	-2.06219	0	CBS,GMPR,MAOA,PRXL2B,CYB5RL,D2HGDH
GO:0030705	cytoskeleton-dependent intracellular transport	-1.87023	0	CLIP3,TANC2,BORCS8
GO:0030705	cytoskeleton-dependent intracellular transport	-1.87023	0	CLIP3,TANC2,BORCS8
GO:0003018	vascular process in circulatory system	-1.57021	0	CBS,ATP8A1,ZDHHC21
GO:0003018	vascular process in circulatory system	-1.57021	0	CBS,ATP8A1,ZDHHC21
GO:0008017	microtubule binding	-1.5537	0	BCL2L11,CLIP3,REEP2
GO:0008017	microtubule binding	-1.5537	0	BCL2L11,CLIP3,REEP2
GO:1901653	cellular response to peptide	-1.39612	0	CACNB1,BCL2L11,SLC2A8
GO:1901653	cellular response to peptide	-1.39612	0	CACNB1,BCL2L11,SLC2A8

## Sheet: Table S8
Table S8. Results of enrichment analysis of GSE91061_3'-UTR_Shortening
Term	Description	LogP	Log(q-value)	Symbols
GO:0032648	regulation of interferon-beta production	-5.2906	-0.974759	IRF5,REL,TRAIP,TIRAP,ASS1,PSTPIP1,AIM2
GO:0032648	regulation of interferon-beta production	-5.2906	-0.974759	IRF5,REL,TRAIP,TIRAP
GO:0032479	regulation of type I interferon production	-4.07192	-0.202944	IRF5,REL,TRAIP,TIRAP
GO:0006954	inflammatory response	-3.15348	0	ASS1,IRF5,REL,PSTPIP1,AIM2,TIRAP
GO:0045087	innate immune response	-2.46277	0	ASS1,IRF5,REL,PSTPIP1,AIM2,TIRAP
GO:0006974	DNA damage response	-4.04167	-0.202944	NPAS2,AIM2,BCL2L11,TRAIP,ATAD5,CTC1,ABRAXAS1,ZSWIM7,PPP1R13B,MAL,NR4A2,TIRAP,CDH13,CD109,ASS1
GO:0006974	DNA damage response	-4.04167	-0.202944	NPAS2,AIM2,BCL2L11,TRAIP,ATAD5,CTC1,ABRAXAS1,ZSWIM7
GO:1902749	regulation of cell cycle G2/M phase transition	-2.88099	0	ATAD5,CTC1,ABRAXAS1
GO:0051054	positive regulation of DNA metabolic process	-2.56753	0	NPAS2,ATAD5,CTC1,ABRAXAS1
GO:0097193	intrinsic apoptotic signaling pathway	-2.43336	0	BCL2L11,PPP1R13B,ATAD5
GO:0002520	immune system development	-2.41835	0	BCL2L11,ATAD5,CTC1
GO:2001233	regulation of apoptotic signaling pathway	-2.19866	0	MAL,NR4A2,BCL2L11,ATAD5
GO:0080135	regulation of cellular response to stress	-1.96119	0	NPAS2,BCL2L11,ATAD5,ABRAXAS1,TIRAP
GO:0006259	DNA metabolic process	-1.7756	0	TRAIP,ATAD5,CTC1,ABRAXAS1,ZSWIM7
GO:0051052	regulation of DNA metabolic process	-1.71807	0	NPAS2,ATAD5,CTC1,ABRAXAS1
GO:0097190	apoptotic signaling pathway	-1.66274	0	BCL2L11,PPP1R13B,ATAD5
GO:1901990	regulation of mitotic cell cycle phase transition	-1.51166	0	ATAD5,CTC1,ABRAXAS1
GO:0008283	cell population proliferation	-1.3333	0	CDH13,ATAD5,CTC1,CD109
GO:0048732	gland development	-1.32696	0	ASS1,BCL2L11,CTC1
GO:0016874	ligase activity	-3.53051	0	ASS1,CTPS2,AARS2,ACSF3,FMO2,ITPA
GO:0016874	ligase activity	-3.53051	0	ASS1,CTPS2,AARS2,ACSF3
GO:0009117	nucleotide metabolic process	-1.87435	0	FMO2,ITPA,CTPS2,ACSF3
GO:0006753	nucleoside phosphate metabolic process	-1.84733	0	FMO2,ITPA,CTPS2,ACSF3
GO:0006520	amino acid metabolic process	-1.77431	0	ASS1,CTPS2,AARS2
GO:0055086	nucleobase-containing small molecule metabolic process	-1.66099	0	FMO2,ITPA,CTPS2,ACSF3
GO:0009259	ribonucleotide metabolic process	-1.49628	0	ITPA,CTPS2,ACSF3
GO:0019693	ribose phosphate metabolic process	-1.46921	0	ITPA,CTPS2,ACSF3
GO:0006163	purine nucleotide metabolic process	-1.32949	0	FMO2,ITPA,ACSF3
GO:1901137	carbohydrate derivative biosynthetic process	-3.02094	0	GBGT1,CTPS2,ALG9,FUT10,TYW3,ACSF3
GO:1901137	carbohydrate derivative biosynthetic process	-3.02094	0	GBGT1,CTPS2,ALG9,FUT10,TYW3,ACSF3
GO:0016758	hexosyltransferase activity	-2.20223	0	GBGT1,ALG9,FUT10
GO:0006486	protein glycosylation	-2.06429	0	GBGT1,ALG9,FUT10
GO:0043413	macromolecule glycosylation	-2.06429	0	GBGT1,ALG9,FUT10
GO:0070085	glycosylation	-1.98135	0	GBGT1,ALG9,FUT10
GO:0016757	glycosyltransferase activity	-1.83732	0	GBGT1,ALG9,FUT10
GO:0009101	glycoprotein biosynthetic process	-1.79488	0	GBGT1,ALG9,FUT10
GO:0009100	glycoprotein metabolic process	-1.53682	0	GBGT1,ALG9,FUT10
GO:0051258	protein polymerization	-3.01049	0	PSTPIP2,PSTPIP1,MAP7D3,NEXN
GO:0051258	protein polymerization	-3.01049	0	PSTPIP2,PSTPIP1,MAP7D3
GO:0051015	actin filament binding	-2.12532	0	PSTPIP2,PSTPIP1,NEXN
GO:0009410	response to xenobiotic stimulus	-2.86704	0	ASS1,FMO2,NPAS2,AIM2,CYP2R1,BCL2L11,CRTC1
GO:0009410	response to xenobiotic stimulus	-2.86704	0	ASS1,FMO2,NPAS2,AIM2,CYP2R1
GO:0071466	cellular response to xenobiotic stimulus	-2.23332	0	FMO2,AIM2,CYP2R1
GO:0048871	multicellular organismal-level homeostasis	-1.58277	0	FMO2,AIM2,BCL2L11,CRTC1
GO:0008017	microtubule binding	-2.73762	0	BCL2L11,MAP7D3,ABRAXAS1,HAUS8,ITPA,CHMP6,CTC1,TUBD1
GO:0008017	microtubule binding	-2.73762	0	BCL2L11,MAP7D3,ABRAXAS1,HAUS8
GO:0015631	tubulin binding	-2.22646	0	BCL2L11,MAP7D3,ABRAXAS1,HAUS8
GO:0051276	chromosome organization	-1.87739	0	ITPA,CHMP6,CTC1,ABRAXAS1
GO:0000280	nuclear division	-1.67004	0	BCL2L11,CHMP6,ABRAXAS1
GO:0000226	microtubule cytoskeleton organization	-1.6686	0	TUBD1,MAP7D3,ABRAXAS1,HAUS8
GO:0007059	chromosome segregation	-1.58588	0	CHMP6,ABRAXAS1,HAUS8
GO:0048285	organelle fission	-1.57919	0	BCL2L11,CHMP6,ABRAXAS1
GO:0048511	rhythmic process	-2.69172	0	ASS1,NPAS2,CRTC1,SUV39H2
GO:0048511	rhythmic process	-2.69172	0	ASS1,NPAS2,CRTC1,SUV39H2
GO:0007623	circadian rhythm	-2.60436	0	ASS1,NPAS2,SUV39H2
GO:0009451	RNA modification	-2.30501	0	AARS2,PUS7L,TYW3,DHX8,ATAD5,INTS9
GO:0009451	RNA modification	-2.30501	0	AARS2,PUS7L,TYW3
GO:0140640	catalytic activity, acting on a nucleic acid	-1.51414	0	DHX8,AARS2,ATAD5,TYW3
GO:0140098	catalytic activity, acting on RNA	-1.37902	0	DHX8,AARS2,TYW3
GO:0034470	ncRNA processing	-1.33713	0	INTS9,AARS2,TYW3
GO:0030097	hemopoiesis	-2.03256	0	CD79B,CTC1,FUT10,TIRAP,CD109,AIM2,TRAIP,CRTC1,ATAD5,NPAS2
GO:0030097	hemopoiesis	-2.03256	0	CD79B,CTC1,FUT10,TIRAP,CD109
GO:0051090	regulation of DNA-binding transcription factor activity	-1.91762	0	AIM2,TRAIP,CRTC1,TIRAP
GO:0051091	positive regulation of DNA-binding transcription factor activity	-1.81588	0	AIM2,CRTC1,TIRAP
GO:0002757	immune response-activating signaling pathway	-1.69603	0	CD79B,AIM2,TIRAP
GO:0002764	immune response-regulating signaling pathway	-1.58588	0	CD79B,AIM2,TIRAP
GO:0050778	positive regulation of immune response	-1.50312	0	CD79B,AIM2,ATAD5,TIRAP
GO:0002253	activation of immune response	-1.47815	0	CD79B,AIM2,TIRAP
GO:0031349	positive regulation of defense response	-1.38981	0	NPAS2,AIM2,TIRAP
GO:0061134	peptidase regulator activity	-2.03242	0	MAL,AIM2,CD109,BCL2L11
GO:0061134	peptidase regulator activity	-2.03242	0	MAL,AIM2,CD109
GO:0052547	regulation of peptidase activity	-1.33458	0	AIM2,BCL2L11,CD109
GO:1990778	protein localization to cell periphery	-1.95186	0	MAL,RABEP1,TESC,CDH13
GO:1990778	protein localization to cell periphery	-1.95186	0	MAL,RABEP1,TESC
GO:0051668	localization within membrane	-1.66352	0	CDH13,MAL,RABEP1,TESC
GO:1901652	response to peptide	-1.93345	0	ASS1,IRF5,NR4A2,BCL2L11,TIRAP
GO:1901652	response to peptide	-1.93345	0	ASS1,IRF5,NR4A2,BCL2L11
GO:0071216	cellular response to biotic stimulus	-1.89989	0	ASS1,BCL2L11,TIRAP
GO:1901653	cellular response to peptide	-1.65189	0	ASS1,NR4A2,BCL2L11
GO:0002237	response to molecule of bacterial origin	-1.50548	0	ASS1,IRF5,TIRAP

## Sheet: Table S9
Table S9. Results of enrichment analysis of GSE91061_3'-UTR_Lengthening
Term	Description	LogP	Log(q-value)	Symbols
GO:2000278	regulation of DNA biosynthetic process	-2.94662	0	GINS1,CERS1,NAF1,CIZ1
GO:2000278	regulation of DNA biosynthetic process	-2.94662	0	GINS1,CERS1,NAF1
GO:0051052	regulation of DNA metabolic process	-1.90642	0	GINS1,CERS1,CIZ1,NAF1
GO:0051054	positive regulation of DNA metabolic process	-1.84098	0	GINS1,CIZ1,NAF1
GO:0016746	acyltransferase activity	-2.87979	0	GGT1,CLOCK,CERS1,WWP2,TRIM5,CPT1C
GO:0016746	acyltransferase activity	-2.87979	0	GGT1,CLOCK,CERS1,WWP2,TRIM5,CPT1C
GO:0016747	acyltransferase activity, transferring groups other than amino-acyl groups	-2.1814	0	CLOCK,CERS1,CPT1C
GO:0051090	regulation of DNA-binding transcription factor activity	-1.36186	0	CLOCK,WWP2,TRIM5
GO:0016755	aminoacyltransferase activity	-1.30591	0	GGT1,WWP2,TRIM5
GO:0010638	positive regulation of organelle organization	-2.7878	0	CTTN,PPP3CB,PDE4DIP,CERS1,NAF1,TRIM5
GO:0010638	positive regulation of organelle organization	-2.7878	0	CTTN,PPP3CB,PDE4DIP,CERS1,NAF1
GO:0010506	regulation of autophagy	-1.66935	0	CTTN,CERS1,TRIM5
GO:0031329	regulation of cellular catabolic process	-1.52817	0	CTTN,CERS1,TRIM5,NAF1
GO:0090276	regulation of peptide hormone secretion	-2.37747	0	PPP3CB,CLOCK,PASK
GO:0090276	regulation of peptide hormone secretion	-2.37747	0	PPP3CB,CLOCK,PASK
GO:0002791	regulation of peptide secretion	-2.3587	0	PPP3CB,CLOCK,PASK
GO:0090087	regulation of peptide transport	-2.34636	0	PPP3CB,CLOCK,PASK
GO:0046883	regulation of hormone secretion	-2.07586	0	PPP3CB,CLOCK,PASK
GO:0032271	regulation of protein polymerization	-2.34636	0	CTTN,SPTBN1,PDE4DIP
GO:0032271	regulation of protein polymerization	-2.34636	0	CTTN,SPTBN1,PDE4DIP
GO:1902903	regulation of supramolecular fiber organization	-1.57447	0	CTTN,SPTBN1,PDE4DIP
GO:0043254	regulation of protein-containing complex assembly	-1.48292	0	CTTN,SPTBN1,PDE4DIP
GO:0051301	cell division	-1.96528	0	SPTBN1,CNTRL,NDE1,ROPN1B,DYNC2H1,KPTN,CIZ1
GO:0051301	cell division	-1.96528	0	SPTBN1,CNTRL,NDE1,ROPN1B
GO:0007018	microtubule-based movement	-1.56001	0	NDE1,DYNC2H1,ROPN1B
GO:0033365	protein localization to organelle	-1.44104	0	KPTN,CIZ1,DYNC2H1,ROPN1B
GO:0006520	amino acid metabolic process	-1.92452	0	GGT1,ENOSF1,EARS2
GO:0006520	amino acid metabolic process	-1.92452	0	GGT1,ENOSF1,EARS2
GO:0001944	vasculature development	-1.89824	0	PPP3CB,CNTRL,NSDHL,DYNC2H1,POPDC3,FKTN
GO:0001944	vasculature development	-1.89824	0	PPP3CB,CNTRL,NSDHL,DYNC2H1
GO:0007507	heart development	-1.82955	0	PPP3CB,CNTRL,POPDC3,DYNC2H1
GO:0007517	muscle organ development	-1.81458	0	FKTN,PPP3CB,POPDC3

## Sheet: Table S10
Table S10. List of APA factors
APA_Factor
POLR2J
ZCCHC8
MTREX
POLR2B
U2AF2
DDX20
PABPC1
CPSF1
RBM7
XRCC5
EIF3I
SF3B2
PAPOLA
PABPC4
HNRNPC
SUPT16H
CIRBP
POLR2E
SF3A1
DDX17
RBFOX2
PABPN1
CSTF1
CSTF2
INTS6
INTS9
EIF3E
INTS10
SNRNP70
SF3A2
EIF3B
EIF3A
INTS2
DDX5
DHX15
PRPF19
DDX6
CPSF6
EIF4G1
PAPOLG
SF3B1
SFPQ
CPSF3
RBM25
IFIT3
RBBP6
DDX39A
SYMPK
RBM39
PRPF38B
CDC73
RBMX2
DDX9
WDR33
SF3B4
INTS7
INTS3
PARP1
EIF2A
FIP1L1
G3BP1
NONO
EIF3H
INTS4
CPSF7
EEF1A1
U2AF1
CPSF4
EIF4A1
INTS8
PCF11
CPSF2
NUDT21
SRRM2
SF1
HNRNPH1
CLP1
PPP1CA
JUP
DDX23
DHX36
EIF3F
CSTF3
PUF60
POLR2A
SF3A3
IFIT1
XRCC6
SND1
DDX39B
PPP1R10
RACK1
PPP1CB
DDX3X
PRKDC
EEF1G
GTF2I
TAF15

[truncated: 12 more sheets: Table S11, Table S12, Table S13, Table S14, Table S15, Table S16, Table S17, Table S18, Table S19, Table S20, Table S21, 0]
